# Supplementary material for: Population Structure and Evolution of Rhinoviruses
Source: PubMed Central journal article supplement (PMC3929619; doi:10.1371/journal.pone.0088981), 2014-02-19

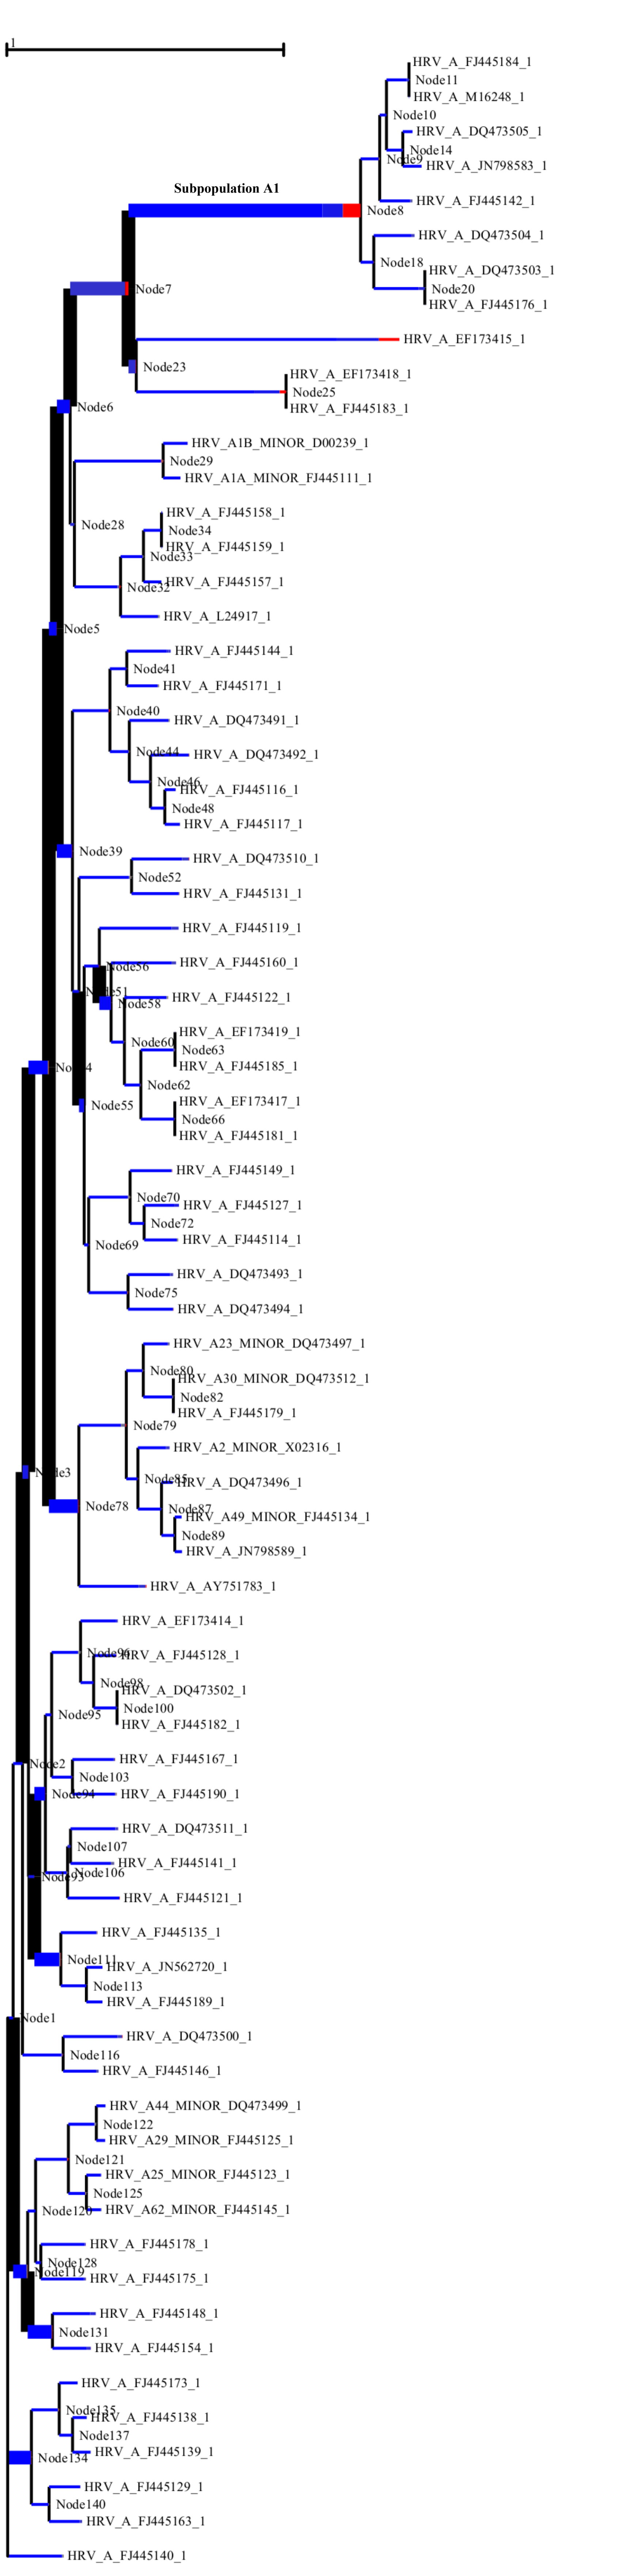

Supplement: pone.0088981.s004.pdf [file pone.0088981.s004.pdf]
