# Supplementary material for: Population Structure and Evolution of Rhinoviruses
Source: PubMed Central journal article supplement (PMC3929619; doi:10.1371/journal.pone.0088981), 2014-02-19
Supplement: pone.0088981.s005.pdf [file pone.0088981.s005.pdf]

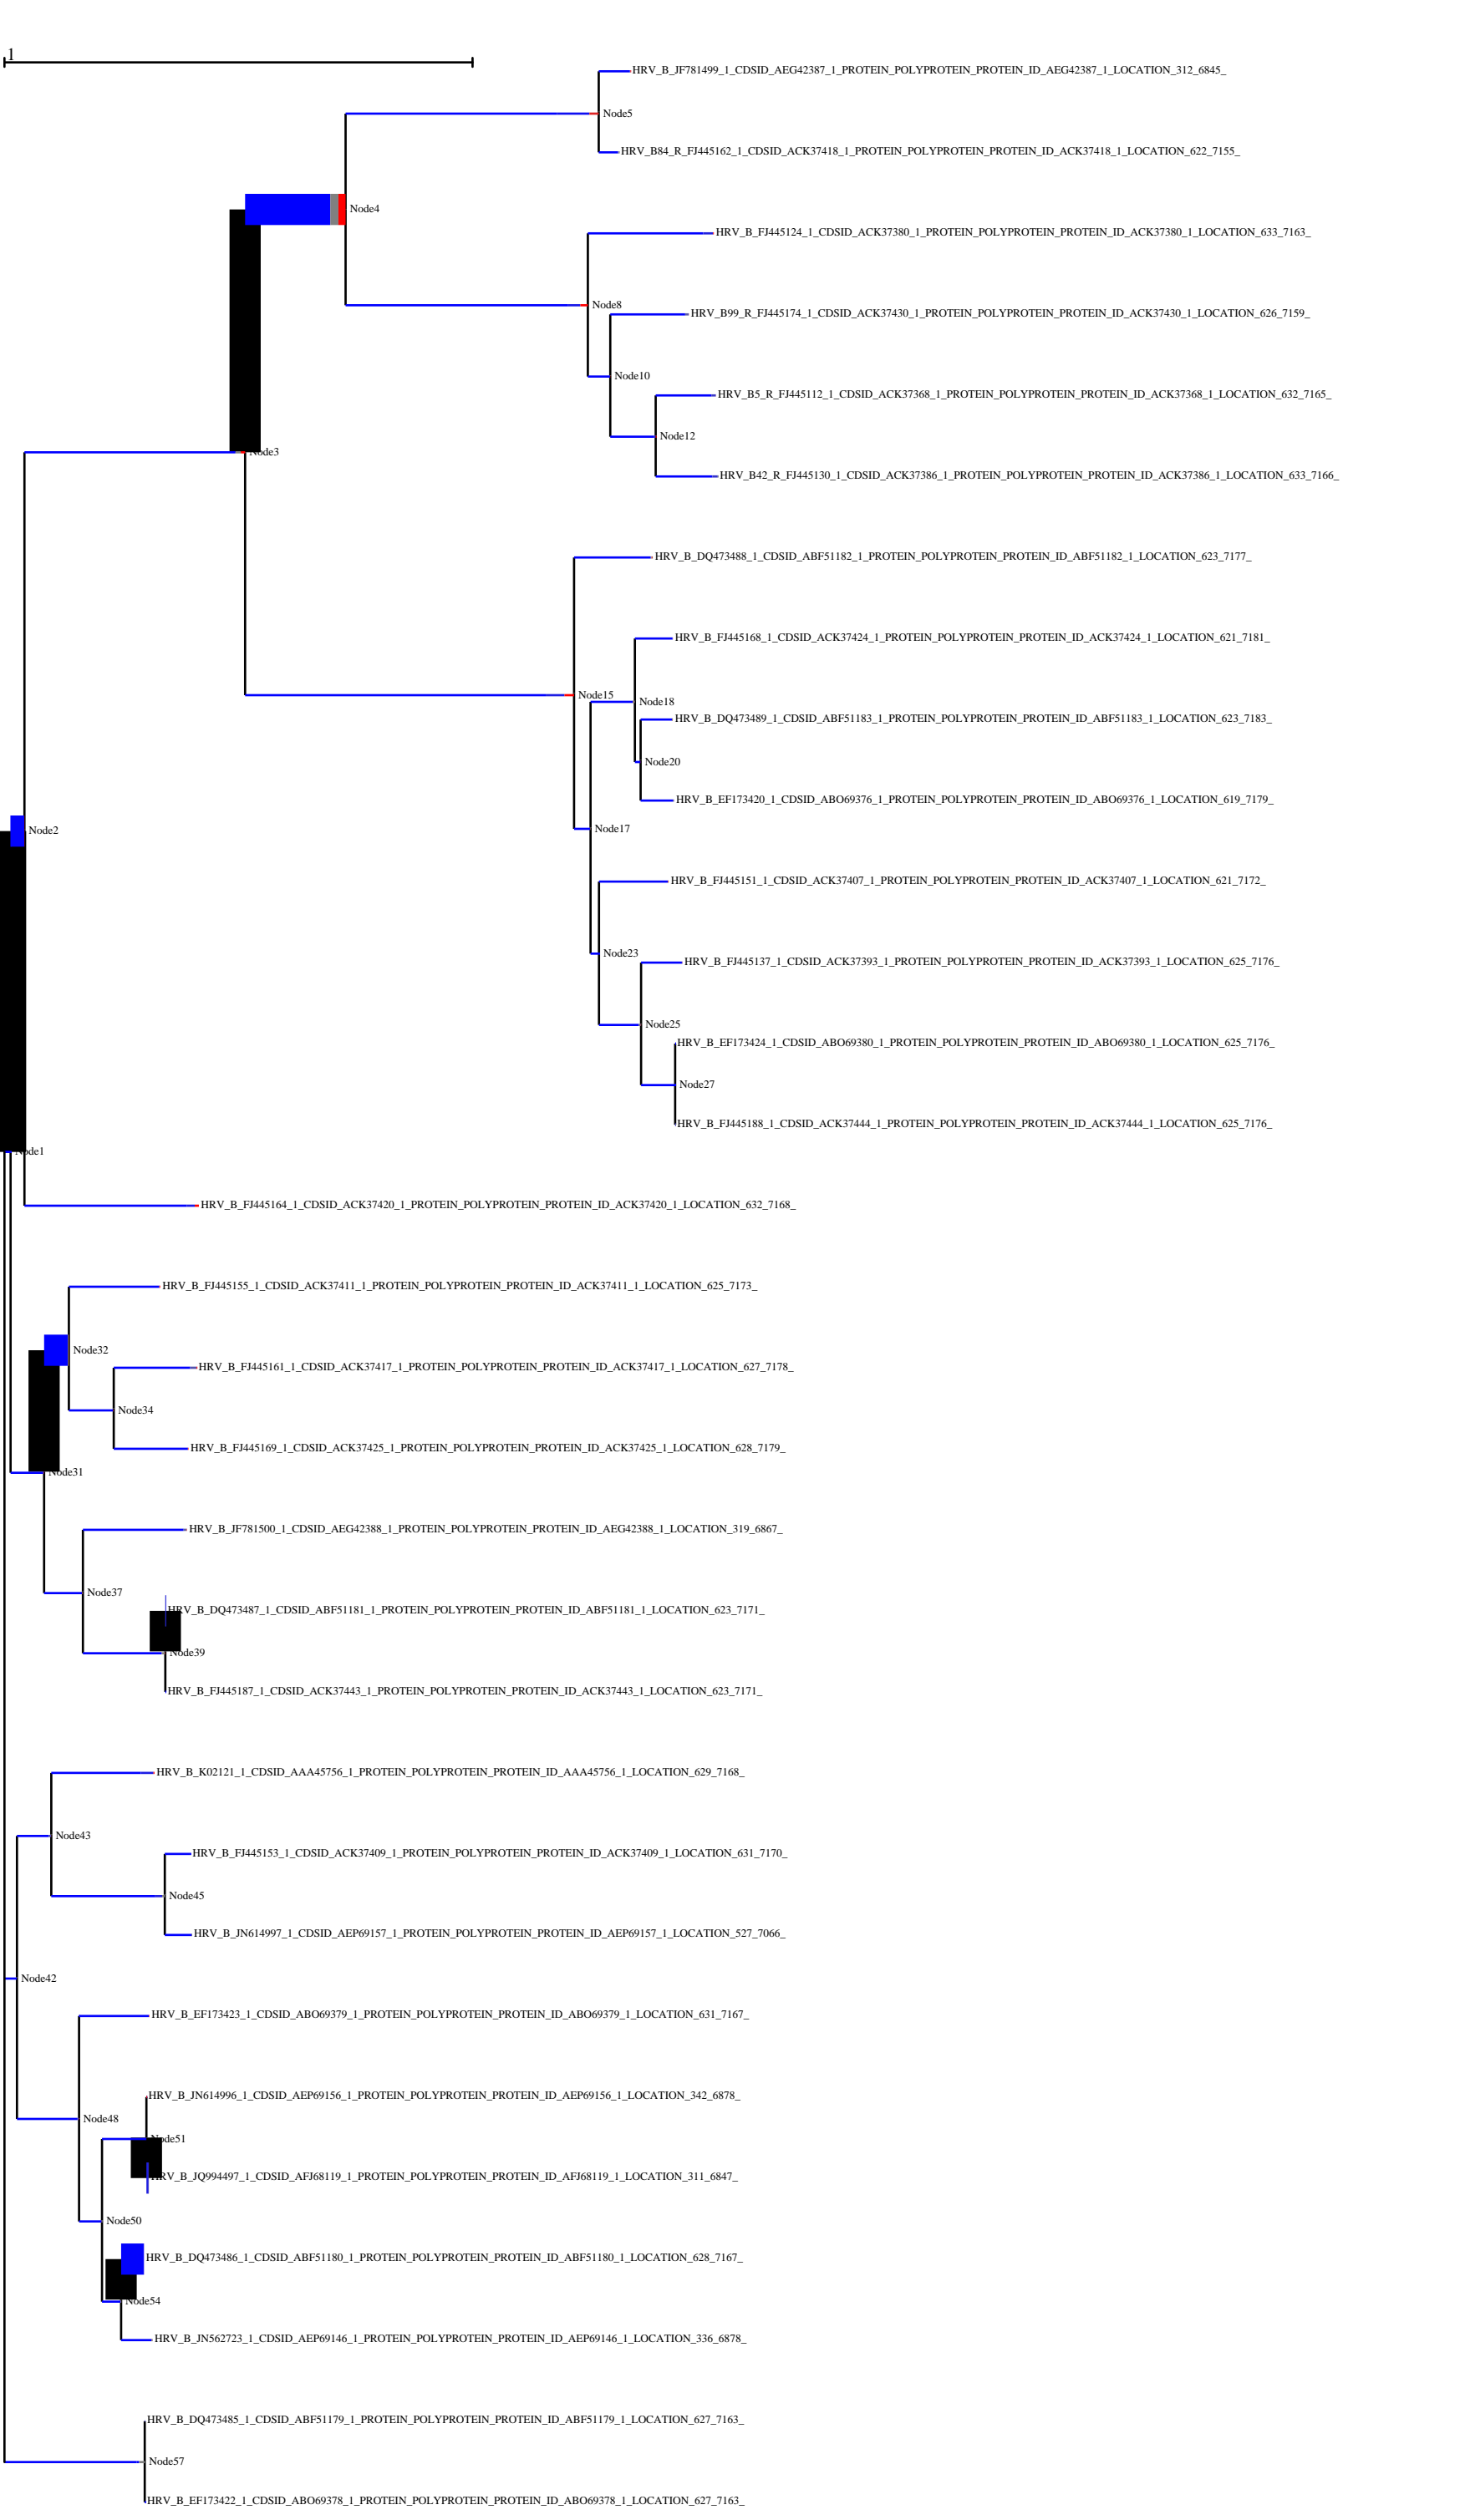

HRV\_B\_JF781499\_1\_CDSID\_AEG42387\_1\_PROTEIN\_POLYPROTEIN\_PROTEIN\_ID\_AEG42387\_1\_LOCATION\_312\_6845\_

Node5

HRV\_B84\_R\_FJ445162\_1\_CDSID\_ACK37418\_1\_PROTEIN\_POLYPROTEIN\_PROTEIN\_ID\_ACK37418\_1\_LOCATION\_622\_7155\_

Node4

HRV\_B\_FJ445124\_1\_CDSID\_ACK37380\_1\_PROTEIN\_POLYPROTEIN\_PROTEIN\_ID\_ACK37380\_1\_LOCATION\_633\_7163\_

Node8

HRV\_B99\_R\_FJ445174\_1\_CDSID\_ACK37430\_1\_PROTEIN\_POLYPROTEIN\_PROTEIN\_ID\_ACK37430\_1\_LOCATION\_626\_7159\_

Node10

HRV\_B5\_R\_FJ445112\_1\_CDSID\_ACK37368\_1\_PROTEIN\_POLYPROTEIN\_PROTEIN\_ID\_ACK37368\_1\_LOCATION\_632\_7165\_

Node12

HRV\_B42\_R\_FJ445130\_1\_CDSID\_ACK37386\_1\_PROTEIN\_POLYPROTEIN\_PROTEIN\_ID\_ACK37386\_1\_LOCATION\_633\_7166\_

Node3

HRV\_B\_DQ473488\_1\_CDSID\_ABF51182\_1\_PROTEIN\_POLYPROTEIN\_PROTEIN\_ID\_ABF51182\_1\_LOCATION\_623\_7177\_

Node15

HRV\_B\_FJ445168\_1\_CDSID\_ACK37424\_1\_PROTEIN\_POLYPROTEIN\_PROTEIN\_ID\_ACK37424\_1\_LOCATION\_621\_7181\_

Node18

HRV\_B\_DQ473489\_1\_CDSID\_ABF51183\_1\_PROTEIN\_POLYPROTEIN\_PROTEIN\_ID\_ABF51183\_1\_LOCATION\_623\_7183\_

Node20

HRV\_B\_EF173420\_1\_CDSID\_ABO69376\_1\_PROTEIN\_POLYPROTEIN\_PROTEIN\_ID\_ABO69376\_1\_LOCATION\_619\_7179\_

Node17

HRV\_B\_FJ445151\_1\_CDSID\_ACK37407\_1\_PROTEIN\_POLYPROTEIN\_PROTEIN\_ID\_ACK37407\_1\_LOCATION\_621\_7172\_

Node23

HRV\_B\_FJ445137\_1\_CDSID\_ACK37393\_1\_PROTEIN\_POLYPROTEIN\_PROTEIN\_ID\_ACK37393\_1\_LOCATION\_625\_7176\_

Node25

HRV\_B\_EF173424\_1\_CDSID\_ABO69380\_1\_PROTEIN\_POLYPROTEIN\_PROTEIN\_ID\_ABO69380\_1\_LOCATION\_625\_7176\_

Node27

HRV\_B\_FJ445188\_1\_CDSID\_ACK37444\_1\_PROTEIN\_POLYPROTEIN\_PROTEIN\_ID\_ACK37444\_1\_LOCATION\_625\_7176\_

Node2

Node1

HRV\_B\_FJ445164\_1\_CDSID\_ACK37420\_1\_PROTEIN\_POLYPROTEIN\_PROTEIN\_ID\_ACK37420\_1\_LOCATION\_632\_7168\_

HRV\_B\_FJ445155\_1\_CDSID\_ACK37411\_1\_PROTEIN\_POLYPROTEIN\_PROTEIN\_ID\_ACK37411\_1\_LOCATION\_625\_7173\_

Node32

HRV\_B\_FJ445161\_1\_CDSID\_ACK37417\_1\_PROTEIN\_POLYPROTEIN\_PROTEIN\_ID\_ACK37417\_1\_LOCATION\_627\_7178\_

Node34

HRV\_B\_FJ445169\_1\_CDSID\_ACK37425\_1\_PROTEIN\_POLYPROTEIN\_PROTEIN\_ID\_ACK37425\_1\_LOCATION\_628\_7179\_

Node31

HRV\_B\_JF781500\_1\_CDSID\_AEG42388\_1\_PROTEIN\_POLYPROTEIN\_PROTEIN\_ID\_AEG42388\_1\_LOCATION\_319\_6867\_

Node37

HRV\_B\_DQ473487\_1\_CDSID\_ABF51181\_1\_PROTEIN\_POLYPROTEIN\_PROTEIN\_ID\_ABF51181\_1\_LOCATION\_623\_7171\_

Node39

HRV\_B\_FJ445187\_1\_CDSID\_ACK37443\_1\_PROTEIN\_POLYPROTEIN\_PROTEIN\_ID\_ACK37443\_1\_LOCATION\_623\_7171\_

HRV\_B\_K02121\_1\_CDSID\_AAA45756\_1\_PROTEIN\_POLYPROTEIN\_PROTEIN\_ID\_AAA45756\_1\_LOCATION\_629\_7168\_

Node43

HRV\_B\_FJ445153\_1\_CDSID\_ACK37409\_1\_PROTEIN\_POLYPROTEIN\_PROTEIN\_ID\_ACK37409\_1\_LOCATION\_631\_7170\_

Node45

HRV\_B\_JN614997\_1\_CDSID\_AEP69157\_1\_PROTEIN\_POLYPROTEIN\_PROTEIN\_ID\_AEP69157\_1\_LOCATION\_527\_7066\_

Node42

HRV\_B\_EF173423\_1\_CDSID\_ABO69379\_1\_PROTEIN\_POLYPROTEIN\_PROTEIN\_ID\_ABO69379\_1\_LOCATION\_631\_7167\_

Node48

HRV\_B\_JN614996\_1\_CDSID\_AEP69156\_1\_PROTEIN\_POLYPROTEIN\_PROTEIN\_ID\_AEP69156\_1\_LOCATION\_342\_6878\_

Node51

HRV\_B\_JQ994497\_1\_CDSID\_AFJ68119\_1\_PROTEIN\_POLYPROTEIN\_PROTEIN\_ID\_AFJ68119\_1\_LOCATION\_311\_6847\_

Node50

HRV\_B\_DQ473486\_1\_CDSID\_ABF51180\_1\_PROTEIN\_POLYPROTEIN\_PROTEIN\_ID\_ABF51180\_1\_LOCATION\_628\_7167\_

Node54

HRV\_B\_JN562723\_1\_CDSID\_AEP69146\_1\_PROTEIN\_POLYPROTEIN\_PROTEIN\_ID\_AEP69146\_1\_LOCATION\_336\_6878\_

HRV\_B\_DQ473485\_1\_CDSID\_ABF51179\_1\_PROTEIN\_POLYPROTEIN\_PROTEIN\_ID\_ABF51179\_1\_LOCATION\_627\_7163\_

Node57

HRV\_B\_EF173422\_1\_CDSID\_ABO69378\_1\_PROTEIN\_POLYPROTEIN\_PROTEIN\_ID\_ABO69378\_1\_LOCATION\_627\_7163\_
